# Supplementary material for: Photocatalytic degradation of ciprofloxacin in freshwater aquaculture wastewater by a CNBN membrane: mechanism, antibacterial activity, and cyclability
Source: Royal Society of Chemistry journal article supplement (doi:10.1039/d2en00468b), 2022-01-01
Supplement: d2en00468b1.pdf [file d2en00468b1.pdf]

Supplementary information for

**Photocatalytic degradation of ciprofloxacin in freshwater aquaculture wastewater by CNBN membrane:  
Mechanism, antibacterial activity, and cyclability**

Zhenjun Xiao<sup>a</sup>, Yixun Zheng<sup>a</sup>, Ping Chen<sup>a\*</sup>, Haijin Liu<sup>b</sup>, Zheng Fang<sup>a</sup>, Junlong Zhang<sup>c</sup>, Zifeng Lin<sup>a</sup>, Yudan Zhang<sup>a</sup>, Jin Luo<sup>a</sup>, Weihong Zhang<sup>a</sup>, Wenying Lv<sup>a</sup>, Guoguang Liu<sup>a\*</sup>

<sup>a</sup> School of Environmental Science and Engineering, Guangdong University of Technology, Guangzhou, 510006, China

<sup>b</sup> School of Environment, Key Lab Yellow River & Huaihe River Water Environment, Henan Normal University, Xinxiang, Henan, 453007, China

<sup>c</sup> Macao Environmental Research Institute, Macao University of Science and Technology, Macao, 999078, China

**\*Corresponding Author: Ping Chen; Guoguang Liu**

**E-mail address: [gdutchp@163.com](mailto:gdutchp@163.com); [liugg615@163.com](mailto:liugg615@163.com)**

**Phone: +86-20-39322547, Fax: +86-20-39322548**

Summary:

Number of pages: 30

Number of Texts: 4

Number of tables: 5

Number of figures: 13

### **Text S1. Method of CN' s preparation**

6 g of melamine was added to an alumina crucible, then the alumina crucible was transferred to a muffle furnace and heated to 550°C at a steady rate of 3 °C min<sup>-1</sup> for 4 hours. After cooling to room temperature, the obtained powder was transferred to an agate mortar for grinding and screening (100 mesh) to obtain the final material (CN).

### **Text S2. Method of HPLC-MS/MS detection.**

The intermediates of CIP were Identified by a liquid chromatograph system (Ultimate 3000RSLC, Thermo Scientific; USA) equipped with Q Exactive Orbitrap precise mass spectrometer (Q Exactive, Thermo Scientific; USA).

Separation of intermediate products was accomplished using an Agilent SB-C18 column (5 μm, 4.6× 150 mm). Flow rate of mobile phase was performed at 0.2 mL min<sup>-1</sup> with H<sub>2</sub>O. containing 0.2 % (v/v) formic acid, as eluent A, and methanol as eluent B. Program elution was employed by a linear gradient in the composition of the mobile phase. Mainly, the proportion of eluent B increased from 10 % to 60 % in 30 min, and then, from 60% to 100% (v/v) in the next 2 min.

### **Text S3. Method of photoluminescence spectra**

The photoluminescence spectra were monitored with fluorescence spectrophotometer (F97 pro, Shanghai Lengguang; China).

### **Text S4. Method of H<sub>2</sub>O<sub>2</sub> detection experiment.**

Method of quantizing H<sub>2</sub>O<sub>2</sub> was referred to Kormann et al. <sup>1,2</sup>. Specifically, 1.5 mL reaction solution was sampled at a certain interval after being filtered by a 0.45 μm filter. Then 0.75 mL potassium phthalate and 0.75 mL potassium iodide reagent were added successively. Potassium iodide reagent was a mixture containing 0.4 M potassium iodide, 0.06 M sodium hydroxide and 10<sup>-4</sup> M ammonium molybdate. Fifteen minutes after the sample was reacted with potassium iodide, the solution was measured by spectrophotometer at 350 nm, and the concentration of H<sub>2</sub>O<sub>2</sub> can be calculated by the standard curve (Fig. S11). In order to make a more intuitive comparison of H<sub>2</sub>O<sub>2</sub> generation in the reaction process, we established the following formula (Eqns. (S1-S2)) to reveal the generation rate, and verified the comparison and matching degree between the established formula and experimental data.

$$\Delta k_{fi} = \frac{dC_i}{dT_i} \quad (\text{Eqn. } S)$$

1.

$$\bar{k}_f = \frac{\sum_{i=0}^n \Delta K_{fi} \cdot T_i}{\sum_{i=0}^n T_i} (\times 10^{-6} M \text{ min}^{-1}) \quad (\text{Eqn. S2})$$

In Eqns. 1-2,  $\Delta k_{fi}$  represents the instantaneous generation rate of  $\text{H}_2\text{O}_2$  ( $\times 10^{-6} M \text{ min}^{-1}$ ),  $\frac{dC_i}{dT_i}$  represents the first derivative of the instantaneous concentration of  $\text{H}_2\text{O}_2$  with respect to time,  $T_i$  represents certain time,  $\bar{k}_f$  represents the average rate of  $\text{H}_2\text{O}_2$  production.

**Table S1. Main water quality parameters for the freshwater aquaculture wastewater.**

| Parameters       | Test method                                                                                                                   | Value                    |
|------------------|-------------------------------------------------------------------------------------------------------------------------------|--------------------------|
| COD              | Potassium dichromate method (GB11914-89, National environmental protection standard of the people's Republic of China)        | 216.2 mg L <sup>-1</sup> |
| ammonia nitrogen | Nessler reagent spectrophotometry (HJ 535-2009, National environmental protection standard of the people's Republic of China) | 20.3 mg L <sup>-1</sup>  |
| pH               | pH meter                                                                                                                      | 5.3                      |

**Table S2. Qualitative analysis result of freshwater aquaculture wastewater by ICP-MS.**

| Element | Concentration (ppm)    |
|---------|------------------------|
| Be      | 0.000007               |
| B       | 0.079316               |
| Na      | 18.584414 <sup>#</sup> |
| Mg      | 3.729475               |
| Al      | 0.002111               |
| k       | 21.110477              |
| Ca      | 6.901739               |
| Ti      | 0.133015               |
| V       | 0.001348               |
| Cr      | 0.000914               |
| Mn      | 0.004137               |
| Fe      | 0.175868               |
| Co      | 0.000233               |
| Ni      | 0.001045               |
| Cu      | 0.001566               |
| Zn      | 0.007099               |
| As      | 0.003694               |
| Se      | 0.000989               |
| Mo      | 0.002168               |
| Ag      | 0.000014               |
| Cd      | 0.00001                |
| Sb      | 0.000341               |
| Ba      | 0.077954               |
| Tl      | 0.000003               |
| Pb      | 0.000274               |

<sup>#</sup> The red numbers represent cationic concentration reaches ppm level

**Table S3. HPLC parameters of contaminants and probes.**

| Names            | Mobile phase composition          | Detection wavelength<br>(nm) | Chromatographic<br>Column | Column<br>Temperature |
|------------------|-----------------------------------|------------------------------|---------------------------|-----------------------|
| Ciprofloxacin    | Methanol :0.2% formic<br>acid     | 278                          | Zorbax Eclipse<br>XDB-C18 | 35°C                  |
|                  | 30:70(v:v)                        |                              | (4.6×250mm)               |                       |
| Ofloxacin        | Methanol :0.2% formic<br>acid     | 293                          | Zorbax Eclipse<br>XDB-C18 | 35°C                  |
|                  | 25:75(v:v)                        |                              | (4.6×250mm)               |                       |
| Norfloxacin      | Methanol :0.2% formic<br>acid     | 278                          | Zorbax Eclipse<br>XDB-C18 | 35°C                  |
|                  | 25:75(v:v)                        |                              | (4.6×250mm)               |                       |
| Sulfamethazine   | Methanol :0.2% formic<br>acid     | 262                          | Zorbax Eclipse<br>XDB-C18 | 35°C                  |
|                  | 30:70(v:v)                        |                              | (4.6×150mm)               |                       |
| Sulfamethoxazole | Methanol :0.2% formic<br>acid     | 275                          | Zorbax Eclipse<br>XDB-C18 | 35°C                  |
|                  | 30:70(v:v)                        |                              | (4.6×150mm)               |                       |
| Sulfisoxazole    | Methanol :0.2% formic<br>acid     | 275                          | Zorbax Eclipse<br>XDB-C18 | 35°C                  |
|                  | 40:60(v:v)                        |                              | (4.6×150mm)               |                       |
| Nitrobenzene     | Acetonitrile :0.1% formic<br>acid | 262                          | Zorbax Eclipse<br>XDB-C18 | 30°C                  |
|                  | 55:45(v:v)                        |                              | (4.6×150mm)               |                       |
| Furfuryl alcohol | Acetonitrile: ultrapure<br>water  | 219                          | Zorbax Eclipse<br>XDB-C18 | 35°C                  |
|                  | 50:50(v:v)                        |                              | (4.6×250mm)               |                       |

**Table S4. Information of transformation products during the degradation of CIP by CNBN membrane photocatalytic system under simulated sunlight irradiation.**

| Sequence number | Retention time (min) | [M+H] <sup>+</sup> | Molecular weight (Da) | Structure |
|-----------------|----------------------|--------------------|-----------------------|-----------|
| CIP             | 8.74                 | 332.13995          | 331                   |           |
| P1              | 14.59                | 318.29990          | 317                   |           |
| P2              | 14.84                | 290.26862          | 289                   |           |
| P3              | 14.73                | 274.27374          | 273                   |           |
| P4              | 17.64                | 256.26328          | 255                   |           |
| P5              | 9.50                 | 362.11423          | 361                   |           |
| P6              | 8.50                 | 344.22733          | 343                   |           |
| P7              | 14.86                | 334.29587          | 333                   |           |

|     |       |           |     |  |
|-----|-------|-----------|-----|--|
| P8  | 13.49 | 334.29495 | 333 |  |
| P9  | 8.37  | 306.12448 | 305 |  |
| P10 | 16.35 | 304.29968 | 303 |  |
| P11 | 13.87 | 263.05663 | 262 |  |
| P12 | 16.85 | 279.22906 | 278 |  |
| P13 | 12.87 | 227.16164 | 226 |  |
| P14 | 9.68  | 245.13567 | 244 |  |
| P15 | 8.95  | 205.09094 | 204 |  |
| P16 | 13.05 | 293.17087 | 292 |  |



|     |       |           |     |                                                                                     |
|-----|-------|-----------|-----|-------------------------------------------------------------------------------------|
| P17 | 10.06 | 279.07959 | 274 | 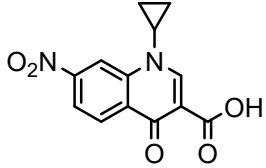 |
|-----|-------|-----------|-----|-------------------------------------------------------------------------------------|

**Table S5. Calculation results of frontier electron densities on atoms of CIP**

| Atom<br>(number) <sup>a</sup> | $2\text{FED}_{\text{HOMO}}^2$ | $\text{FED}_{\text{HOMO}+}^2$<br>$\text{FED}_{\text{LUMO}}^2$ | Point<br>charge |
|-------------------------------|-------------------------------|---------------------------------------------------------------|-----------------|
| N(1)                          | <b>0.43769<sup>b</sup></b>    | <b>0.23168<sup>c</sup></b>                                    | -               |
| C(14)                         | -                             | -                                                             | <b>0.44870</b>  |
| C(15)                         | -                             | <b>0.26899</b>                                                | -               |
| N(4)                          | <b>0.19448</b>                | -                                                             | -               |
| C(22)                         | -                             | -                                                             | <b>0.42240</b>  |
| C(12)                         | -                             | -                                                             | <b>0.37663</b>  |

a: See Figure. S9 in the SI for atomic numbering.

b: The calculation results of electron density on atoms of CIP are referenced from our group's previous research <sup>3</sup>.

c: Significant values are highlighted with color.

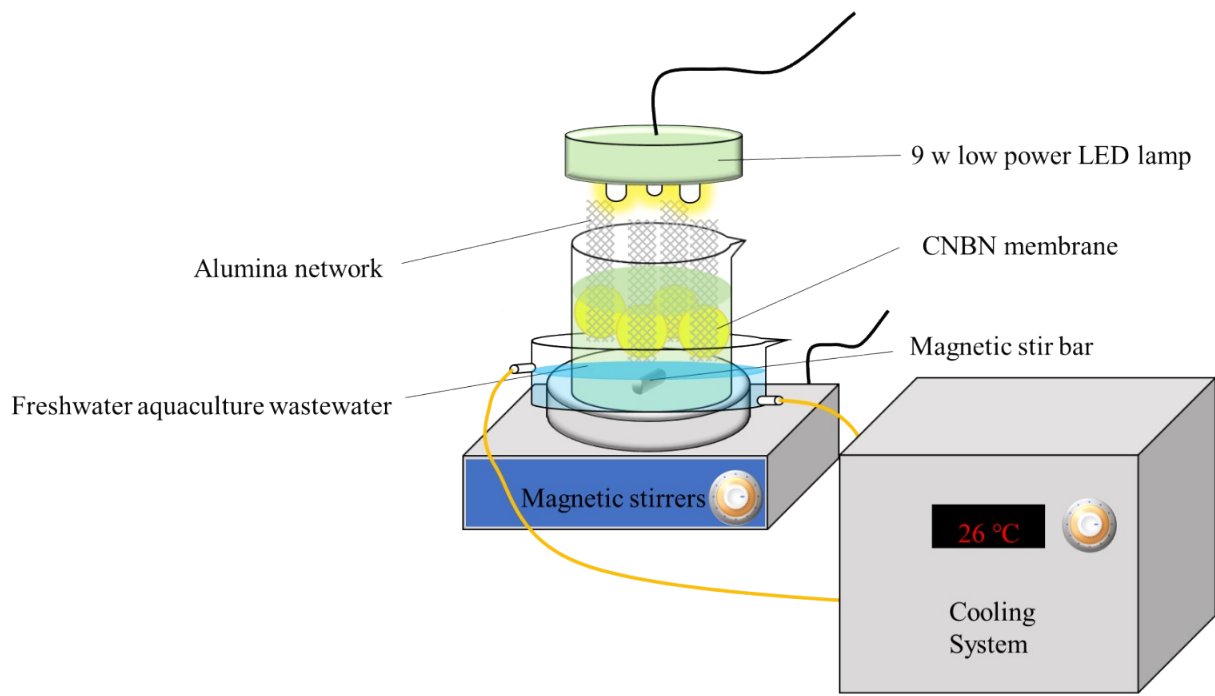

**Figure S1. Reaction equipment**

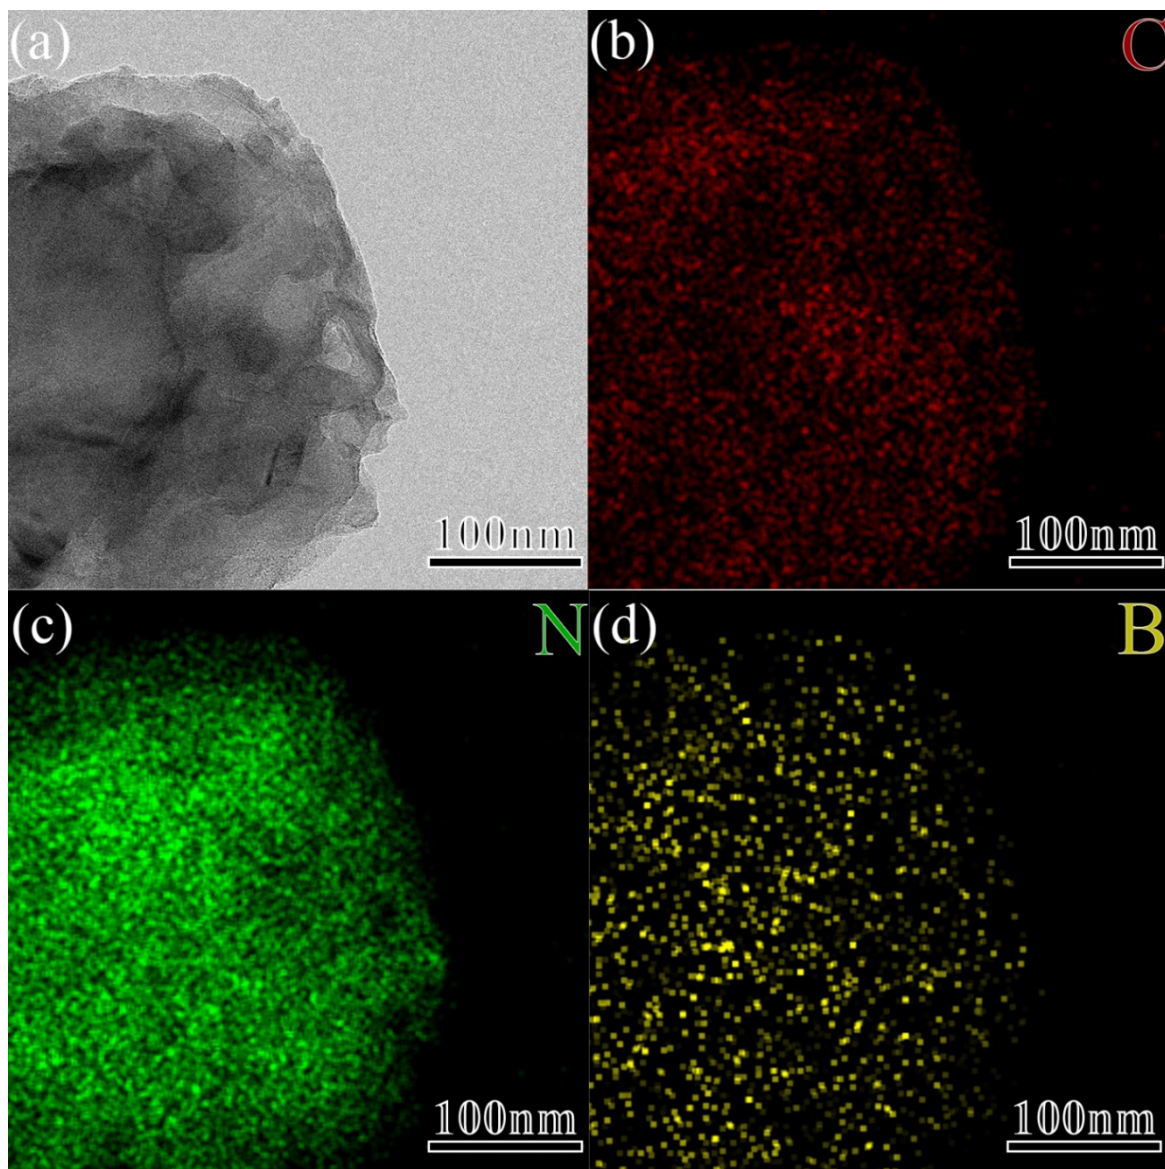

Figure S2. (a) TEM-EDS mapping of CNBN for (b) carbon, (c) nitrogen and (d) boron.

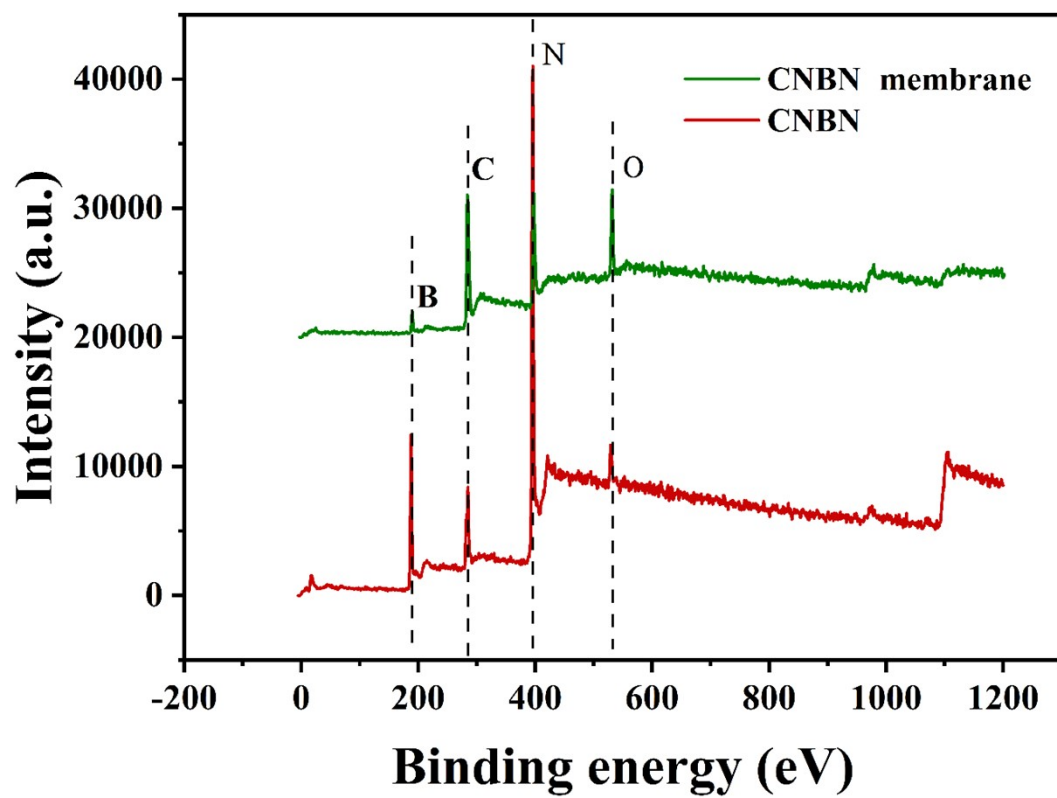

Figure S3. XPS scan spectra of CNBN membrane and CNBN.

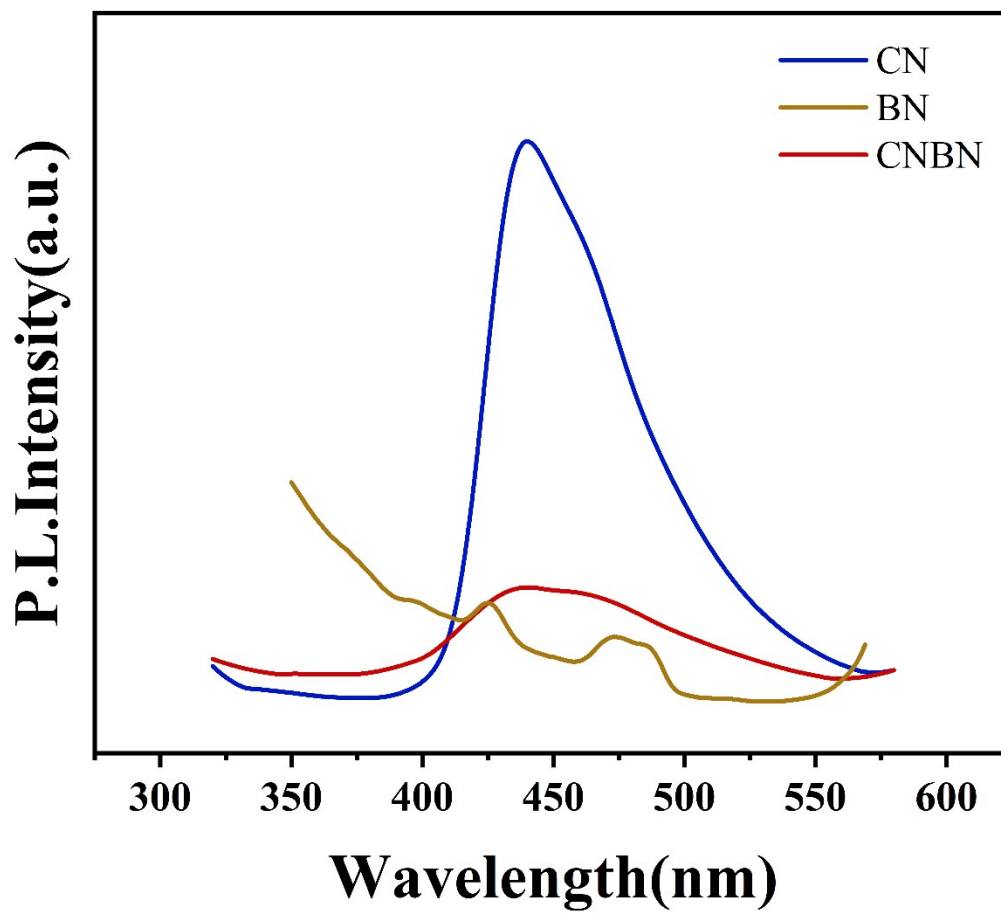

Figure S4. Fluorescence spectra of CN, BN and CNBN.

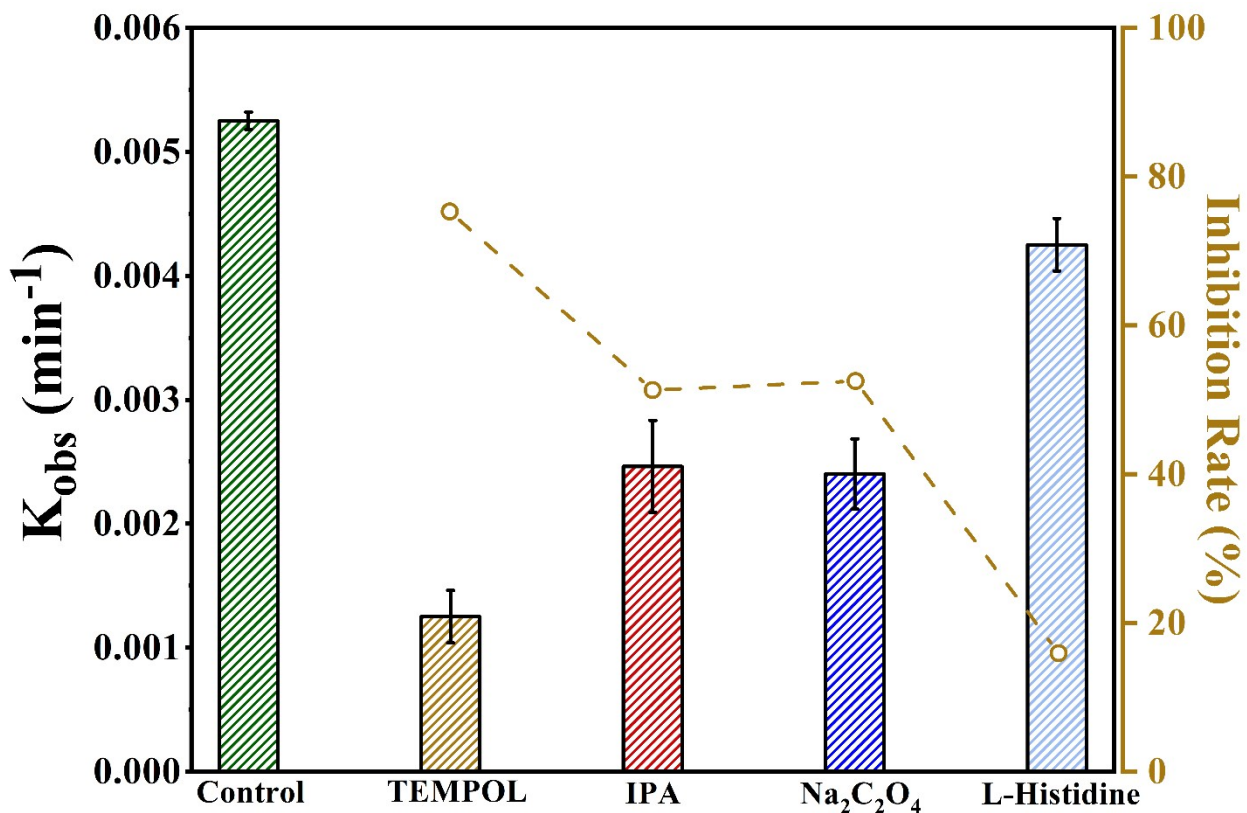

Figure S5. The degradation rate constants of CIP in the presence of scavengers. Four pieces of CNBN membranes, ultrapure water, [CIP]=10 mg L<sup>-1</sup>, [optical power density]=5.71 mW cm<sup>-2</sup>, pH=5.3.

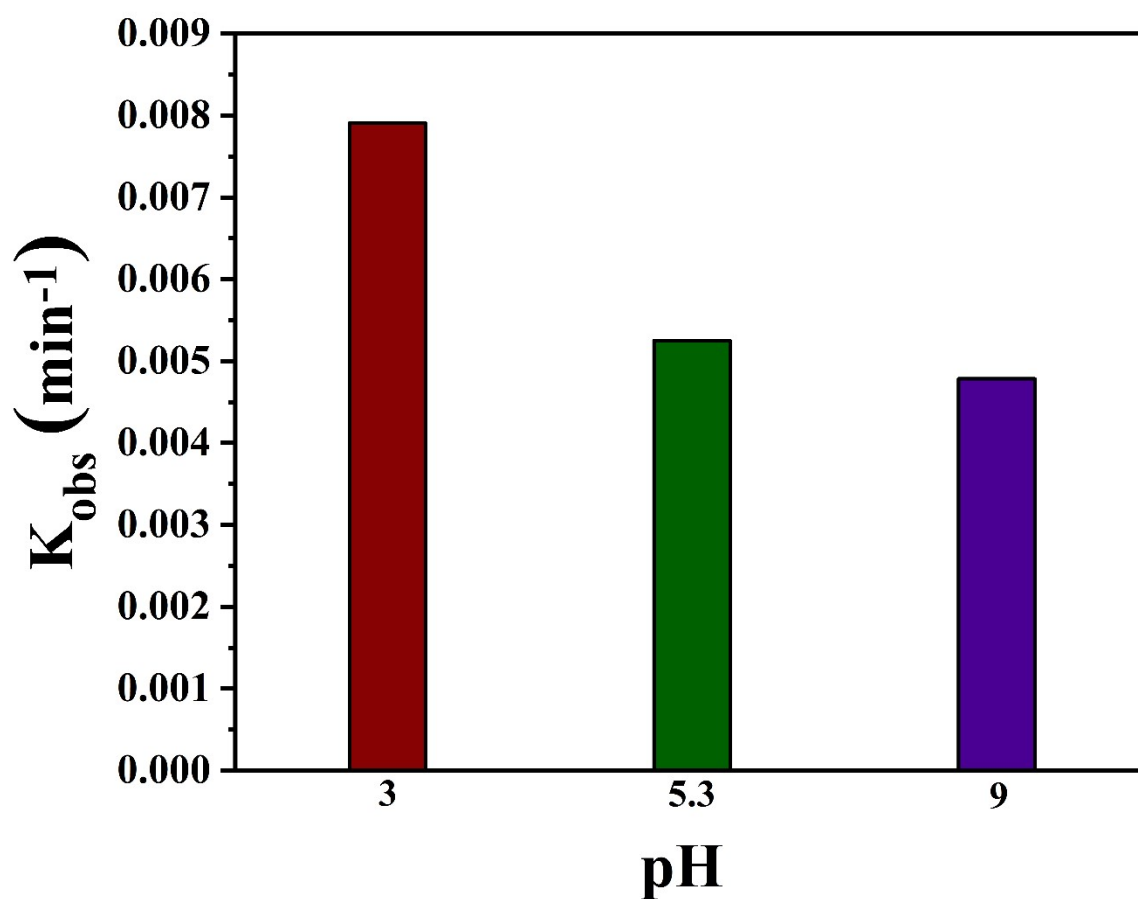

Figure S6. Influence of different initial pH on the degradation of CIP. Sulfuric acid and sodium hydroxide were used to adjust the initial pH while the control group did not adjust pH, four pieces of CNBN membranes, freshwater aquaculture wastewater, [CIP]=10 mg L<sup>-1</sup>, [optical power density]=5.71 mW cm<sup>-2</sup>, pH=5.3.



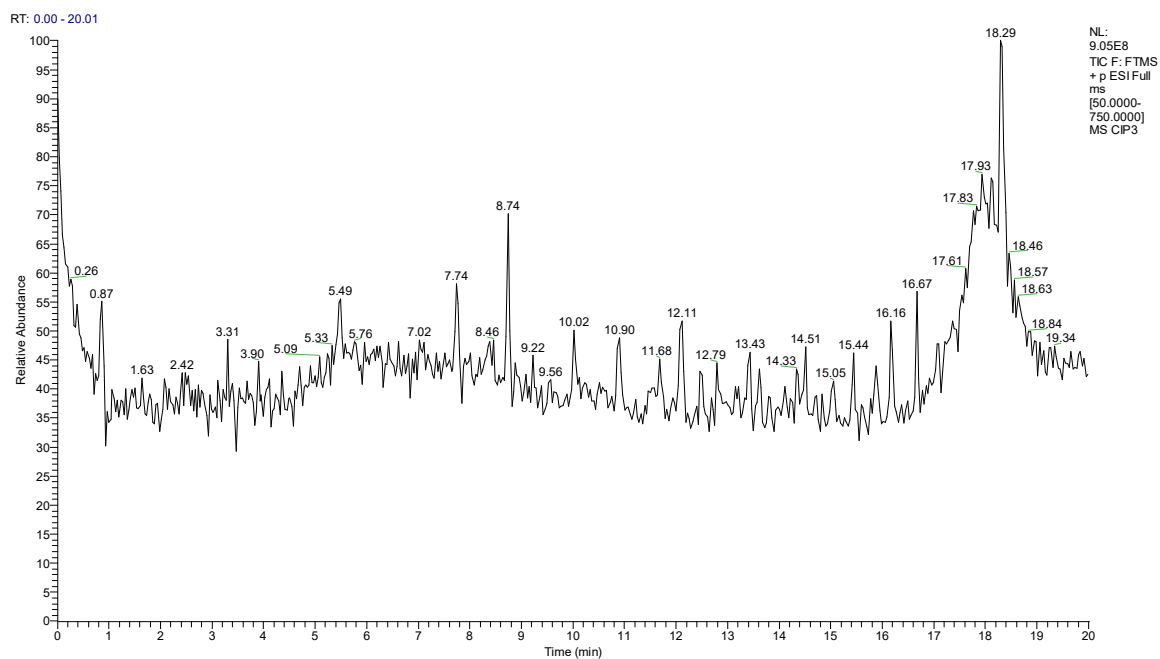

**Figure S7. HPLC-MS/MS total ion current chromatogram of CIP.**

CIP3 #2658 RT: 8.74 AV: 1 NL: 2.45E8  
T: FTMS + p ESI Full ms [50.0000-750.0000]

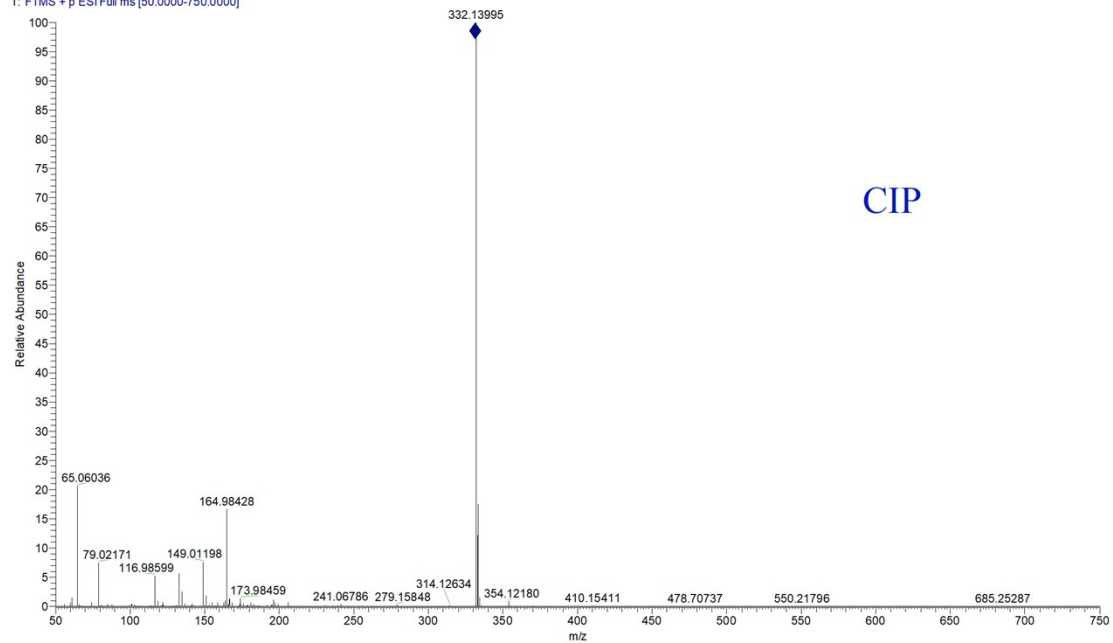

CIP

CIP3 #4590 RT: 14.59 AV: 1 NL: 9.05E4  
T: FTMS + p ESI d Full ms2 318.2997@hcd40.00 [50.0000-345.0000]

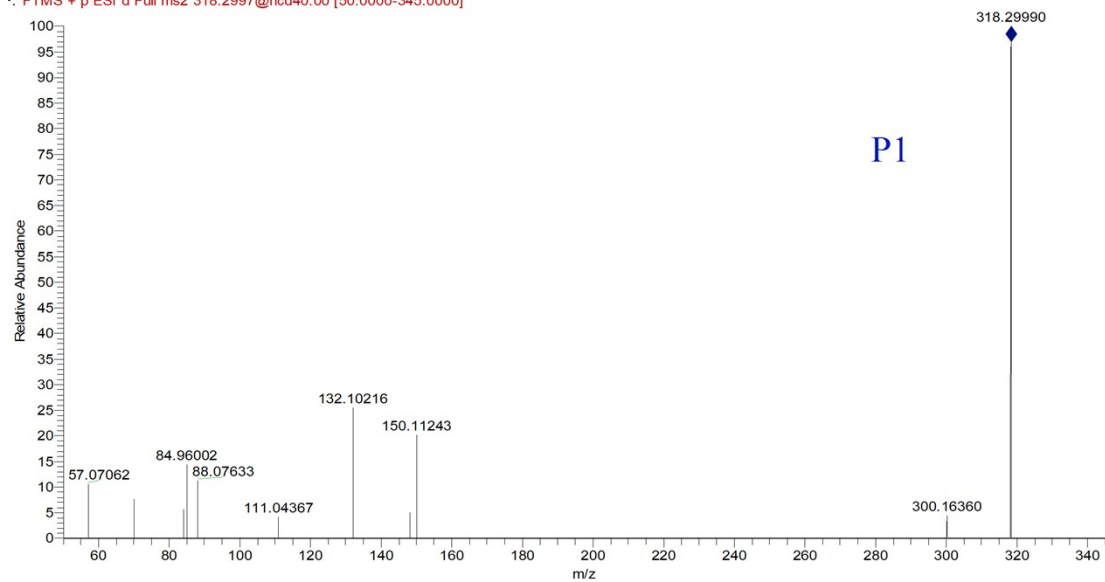

P1

CIP3 #4675 RT: 14.84 AV: 1 NL: 7.28E5  
F: FTMS + p ESI d Full ms2 290.2684@hcd40.00 [50.0000-315.0000]

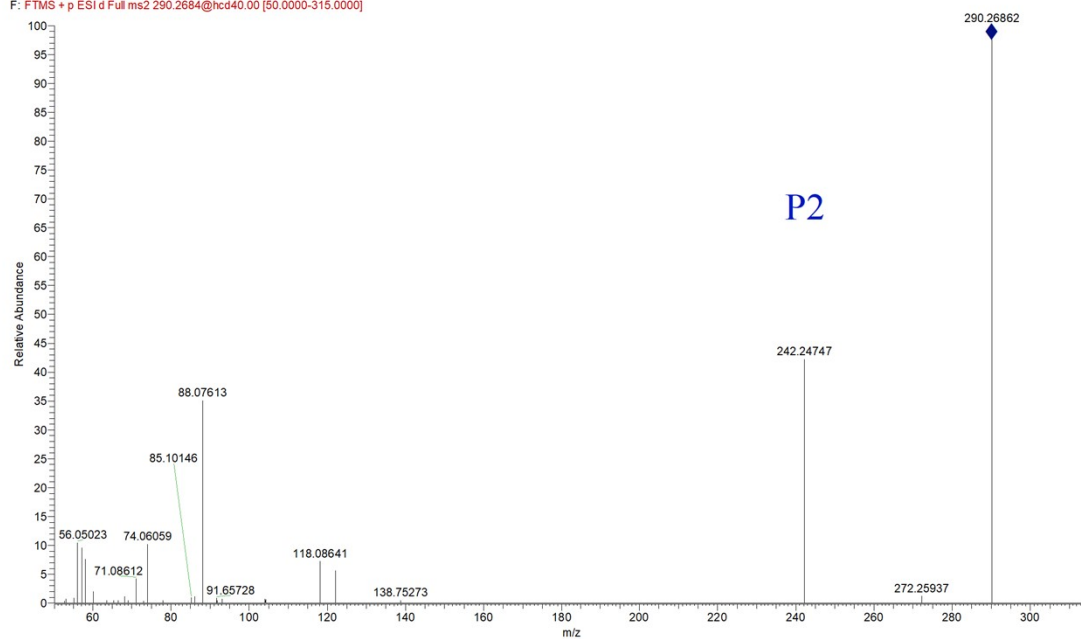

CIP3 #4639 RT: 14.73 AV: 1 NL: 4.02E6  
F: FTMS + p ESI d Full ms2 274.2735@hcd40.00 [50.0000-300.0000]

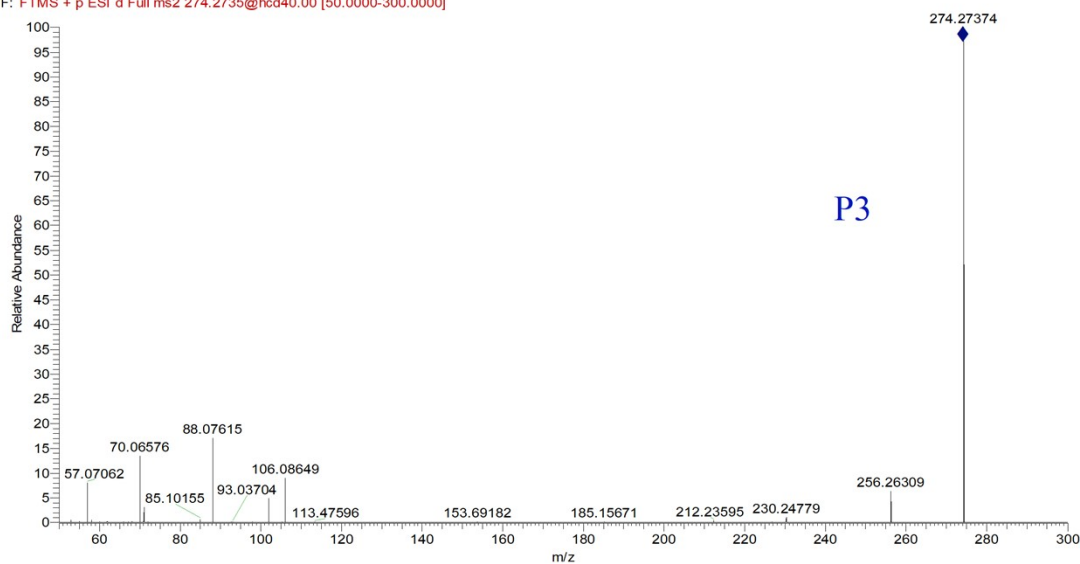

CIP2 #5604 RT: 17.64 AV: 1 NL: 2.62E5  
F: FTMS + p ESI d Full ms2 256.2629@hcd40.00 [50.0000-280.0000]

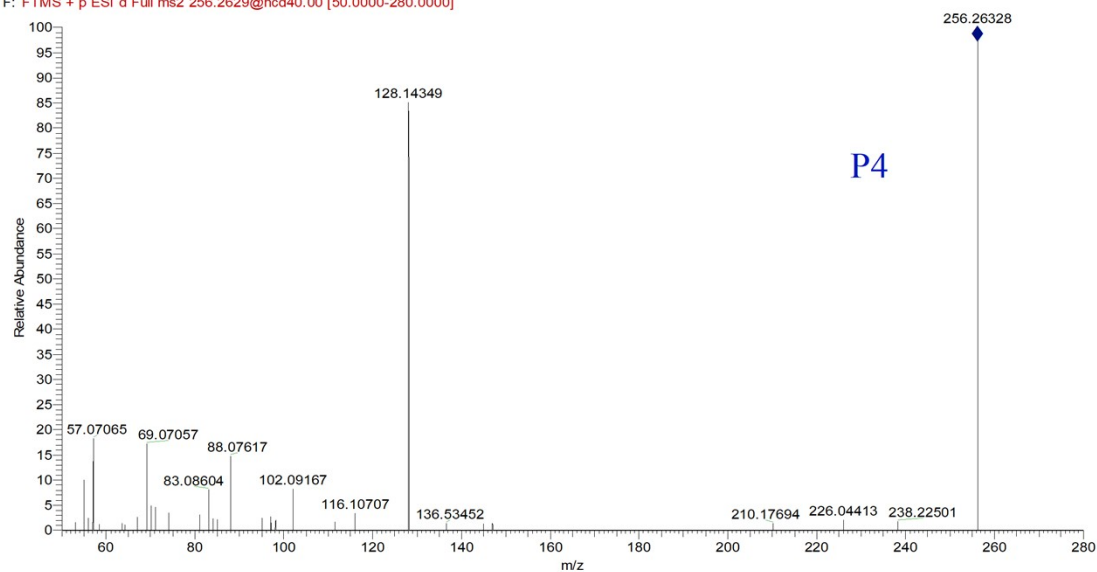

CIP3 #2901 RT: 9.50 AV: 1 NL: 1.11E6  
F: FTMS + p ESI d Full ms2 362.1139@hcd40.00 [50.0000-385.0000]

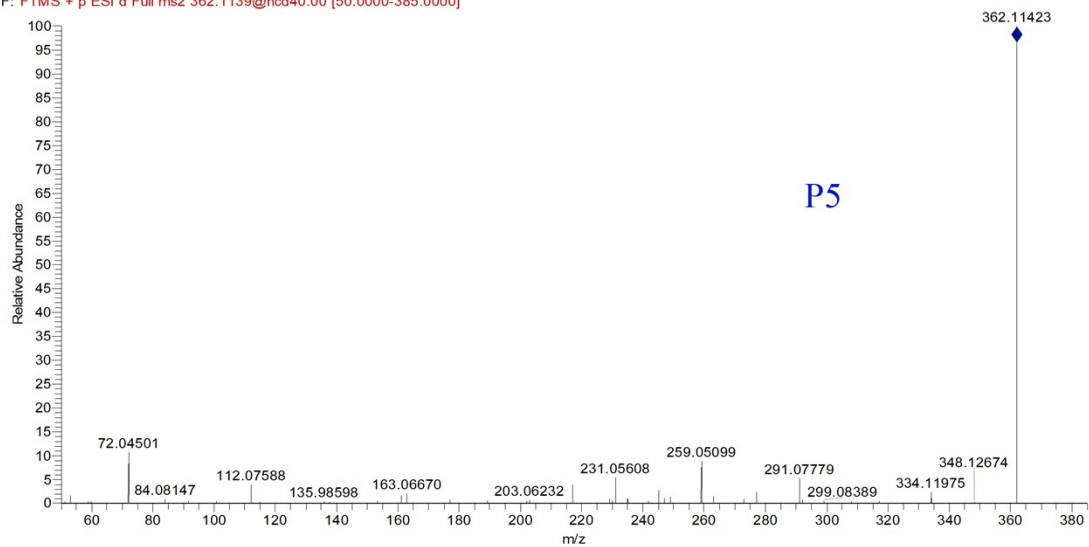

CIP2 #2577 RT: 8.50 AV: 1 NL: 3.33E6  
F: FTMS + p ESI d Full ms2 344.2274@hcd40.00 [50.0000-370.0000]

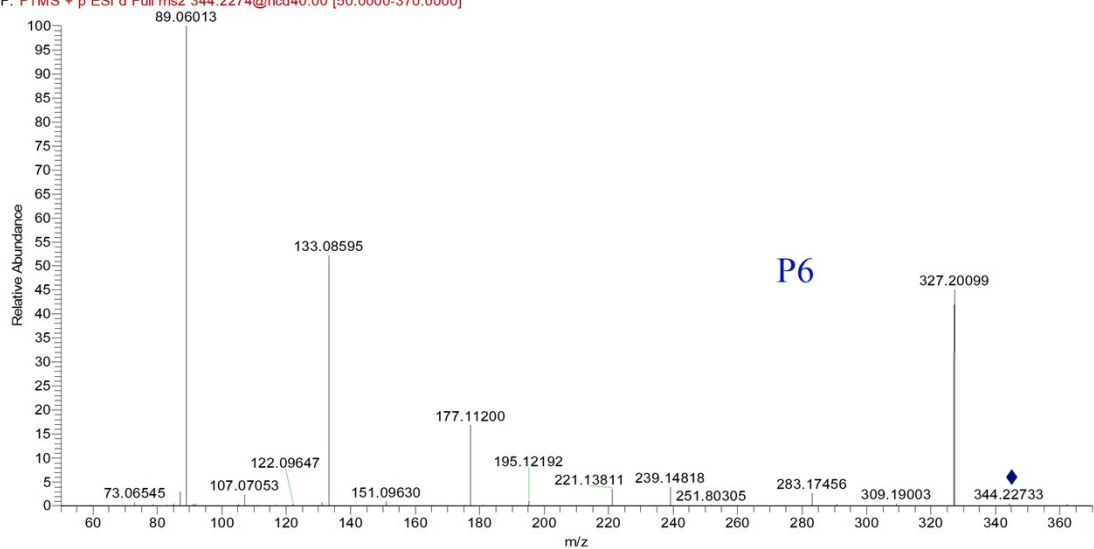

CIP2 #4680 RT: 14.86 AV: 1 NL: 6.51E4  
F: FTMS + p ESI d Full ms2 334.1192@hcd40.00 [50.0000-360.0000]

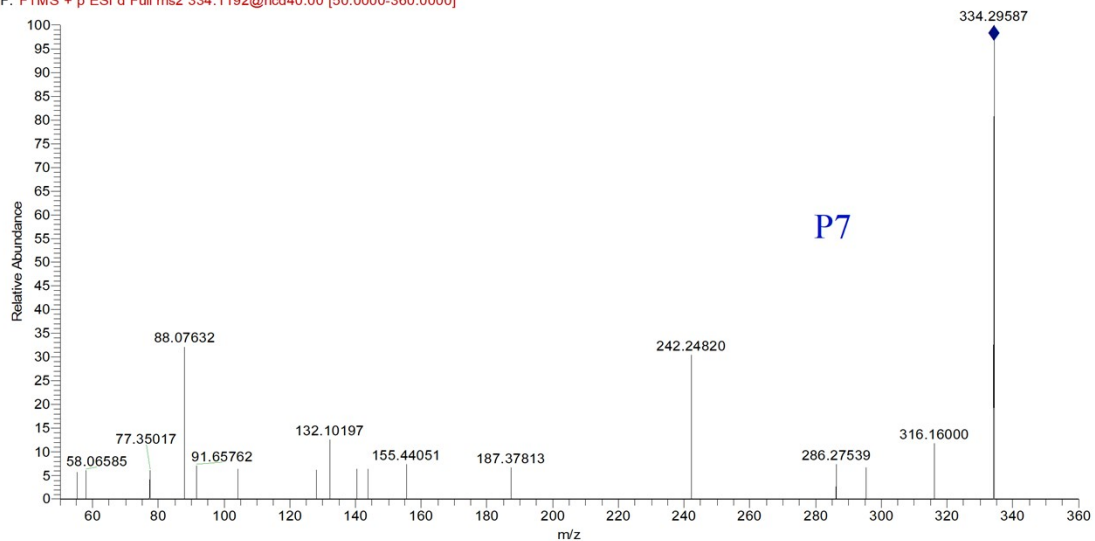

CIP2 #4225 RT: 13.49 AV: 1 NL: 9.77E4  
F: FTMS + p ESI d Full ms2 334.1192@hcd40.00 [50.0000-360.0000]

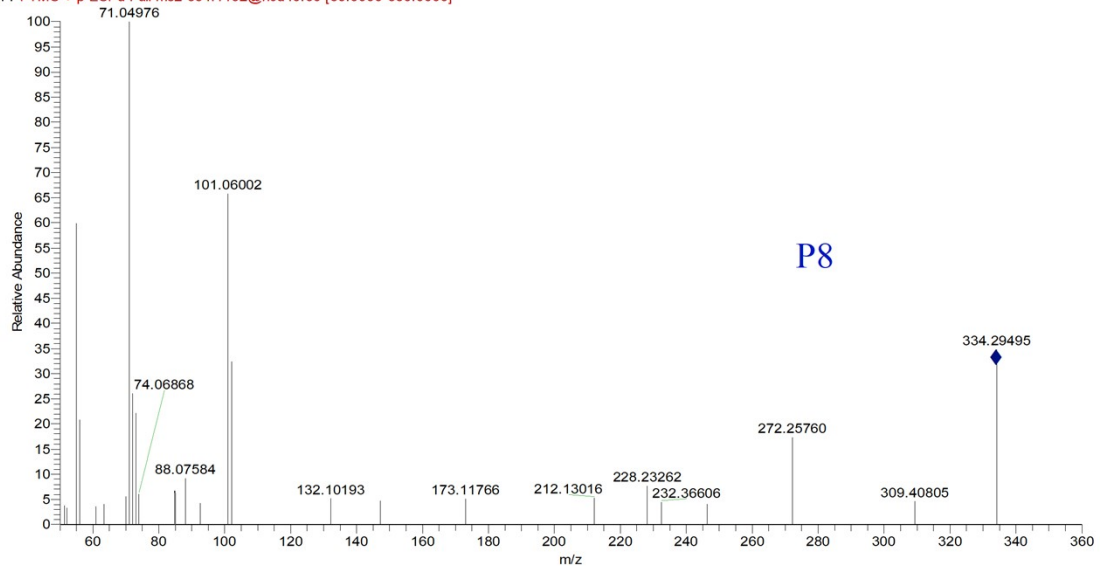

CIP3 #2537 RT: 8.37 AV: 1 NL: 4.98E6  
F: FTMS + p ESI d Full ms2 306.2634@hcd40.00 [50.0000-330.0000]

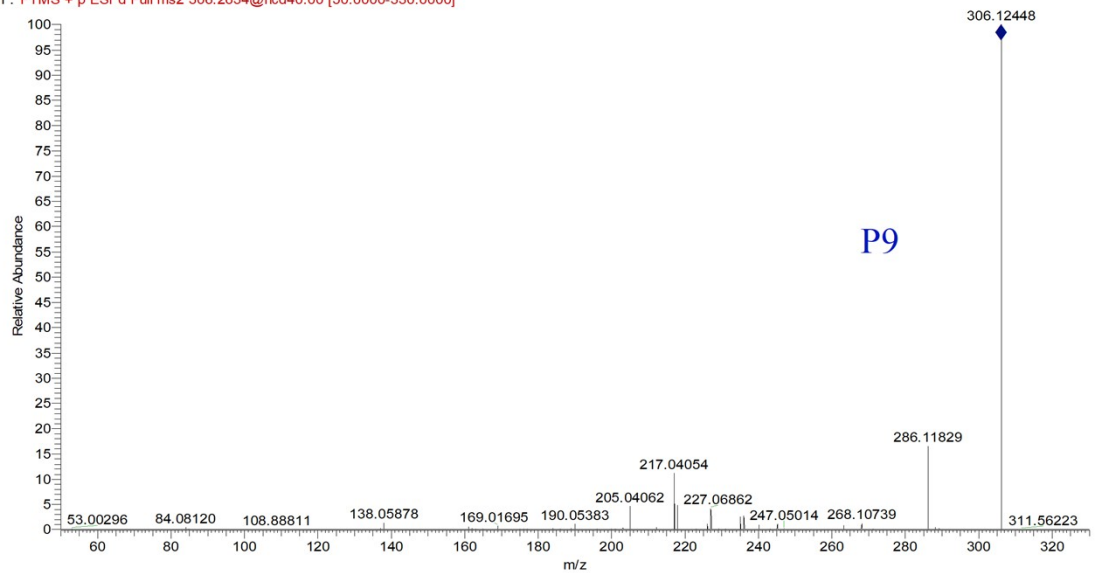

CIP3 #5179 RT: 16.35 AV: 1 NL: 3.56E5  
F: FTMS + p ESI d Full ms2 304.2477@hcd40.00 [50.0000-330.0000]

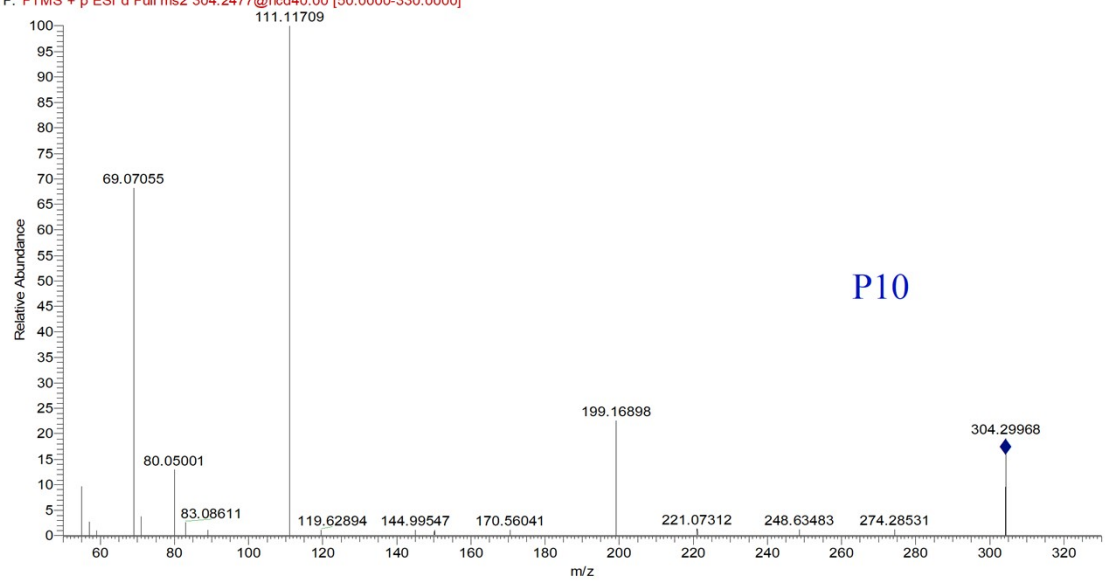

CIP3 #4352 RT: 13.87 AV: 1 NL: 1.47E5  
F: FTMS + p ESI d Full ms2 263.0557@hcd40.00 [50.0000-285.0000]

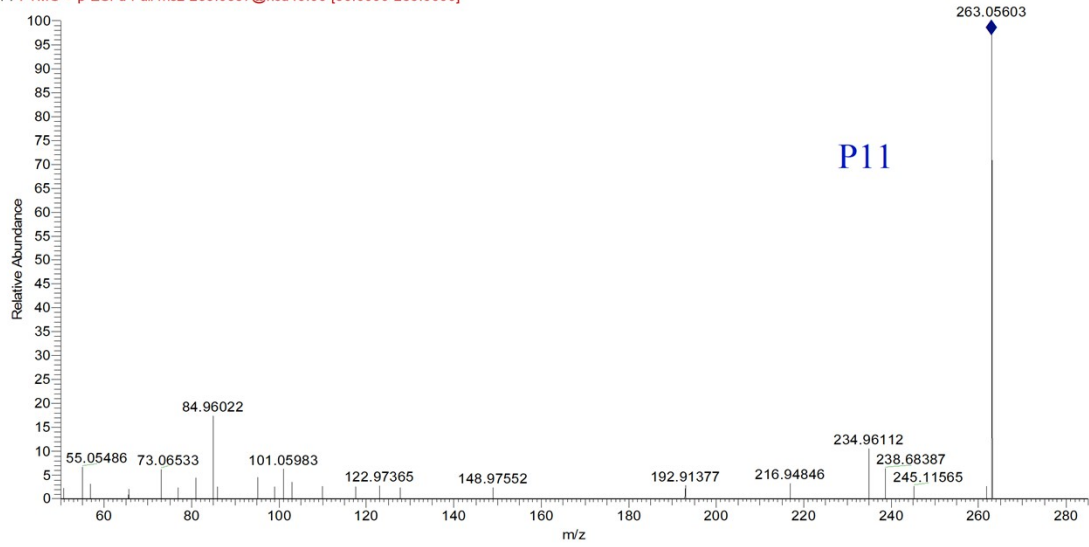

CIP3 #5347 RT: 16.85 AV: 1 NL: 1.22E6  
F: FTMS + p ESI d Full ms2 279.2289@hcd40.00 [50.0000-305.0000]

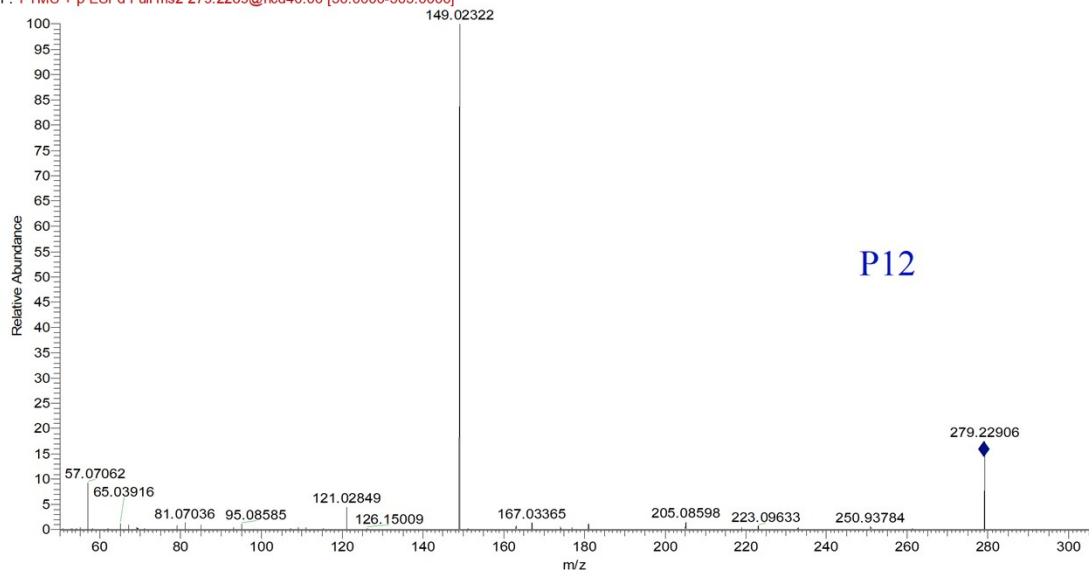

CIP3 #4016 RT: 12.87 AV: 1 NL: 6.08E5  
F: FTMS + p ESI d Full ms2 227.0886@hcd40.00 [50.0000-250.0000]

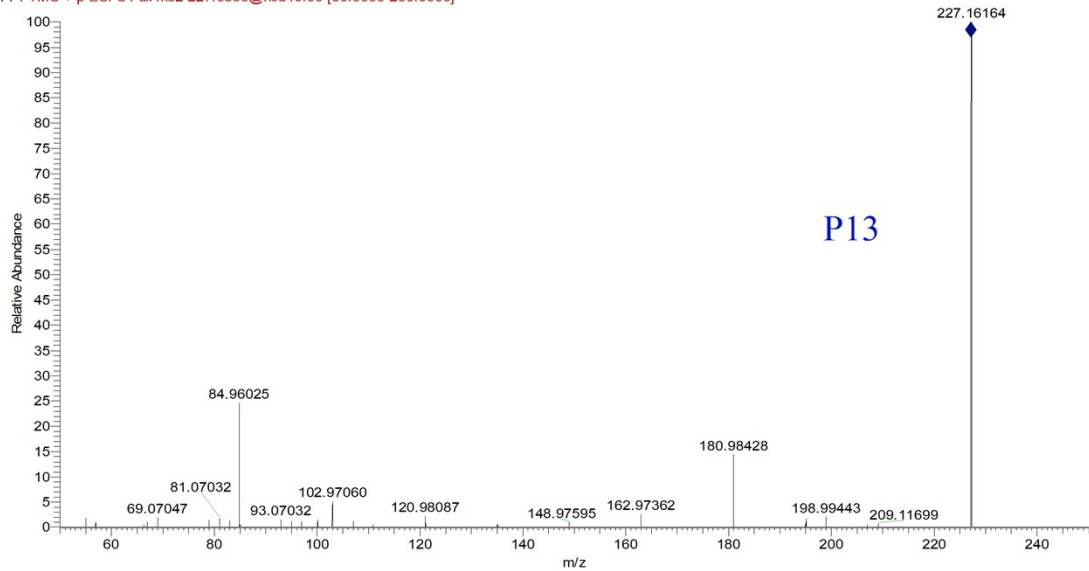

CIP3 #2958 RT: 9.68 AV: 1 NL: 1.46E5  
F: FTMS + p ESI d Full ms2 245.1872@hcd40.00 [50.0000-270.0000]

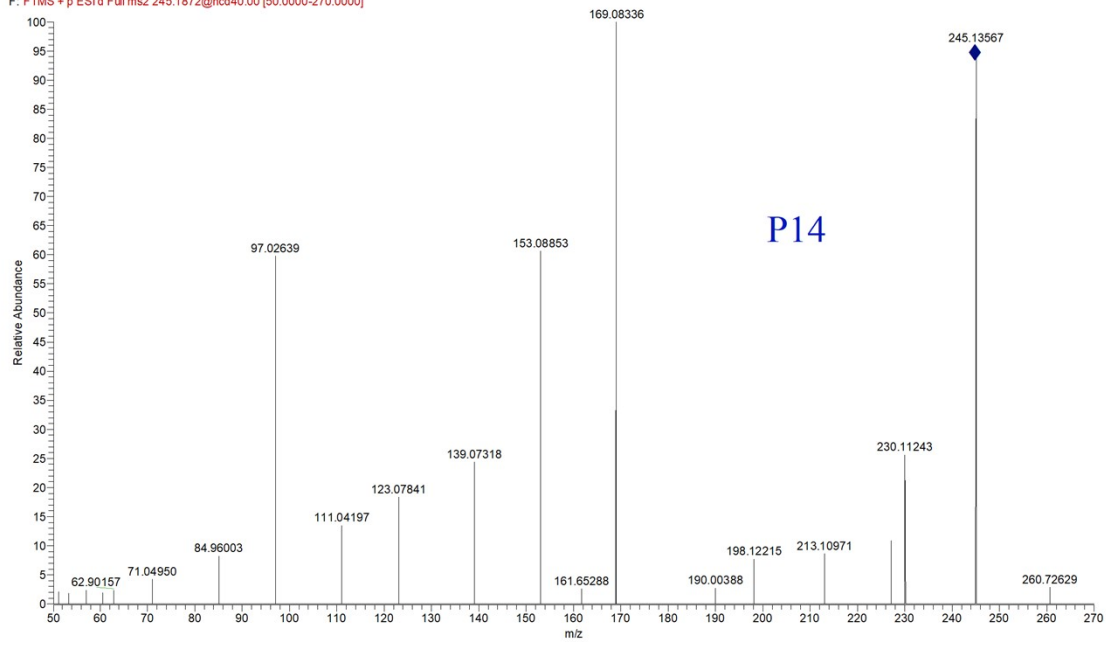

CIP3 #2726 RT: 8.95 AV: 1 NL: 8.75E4  
F: FTMS + p ESI d Full ms2 205.1797@hcd40.00 [50.0000-225.0000]

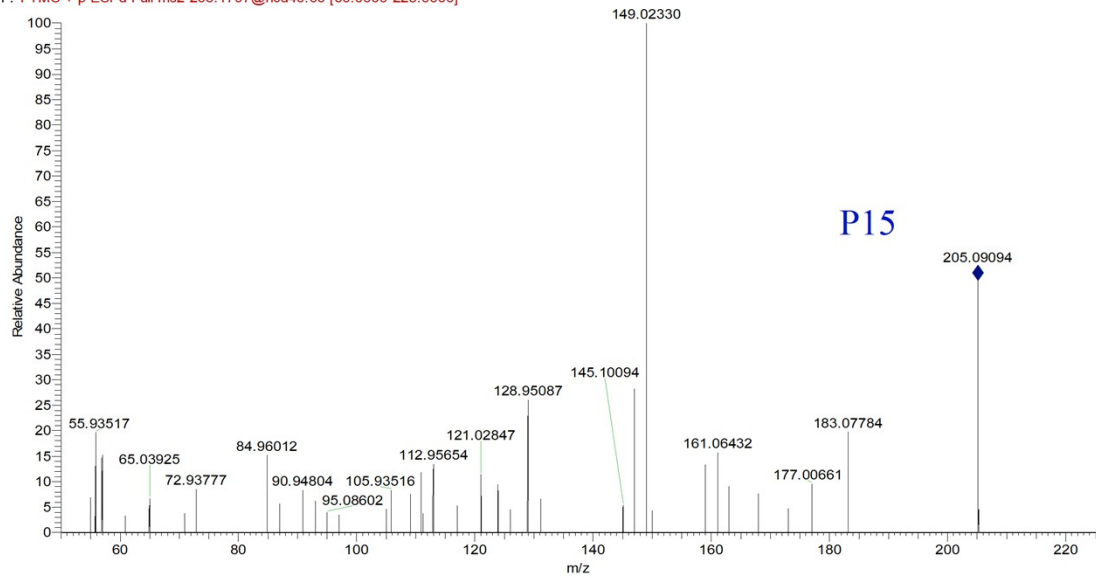

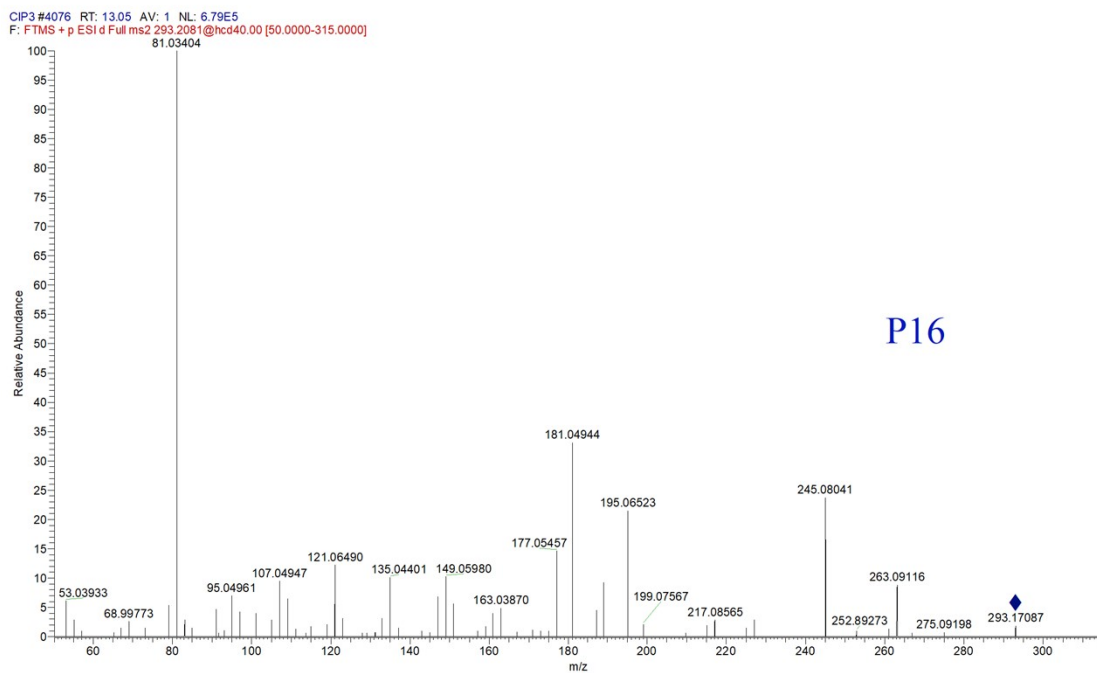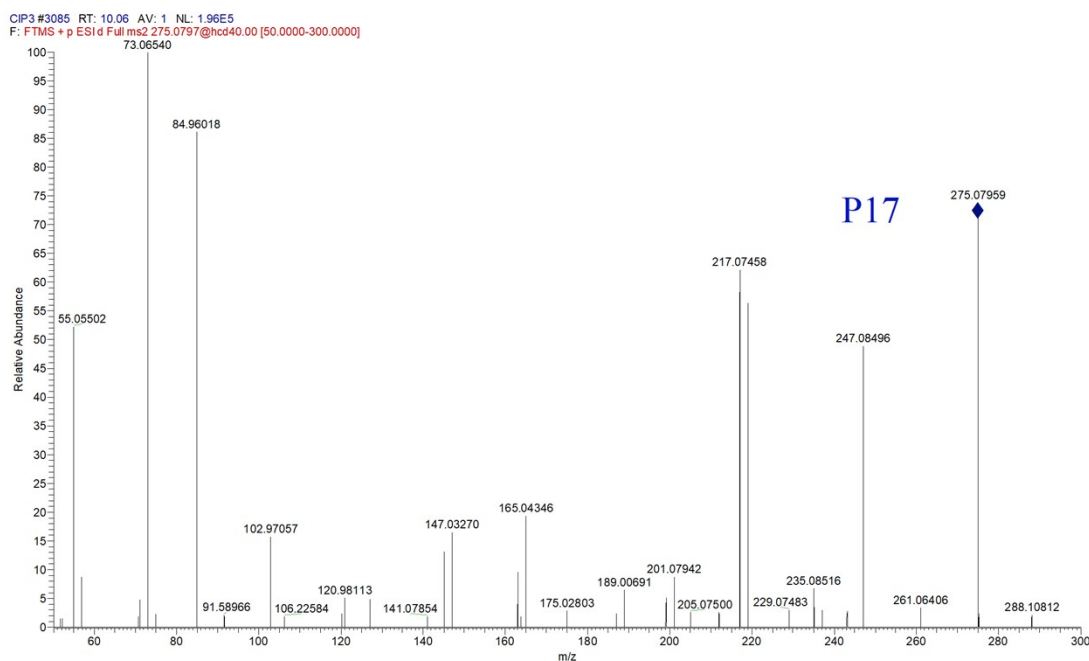

**Figure S8. MS/MS fragmentation information of the observed transformation products (P1-P17), the blue diamond represents the corresponding parent ion.**



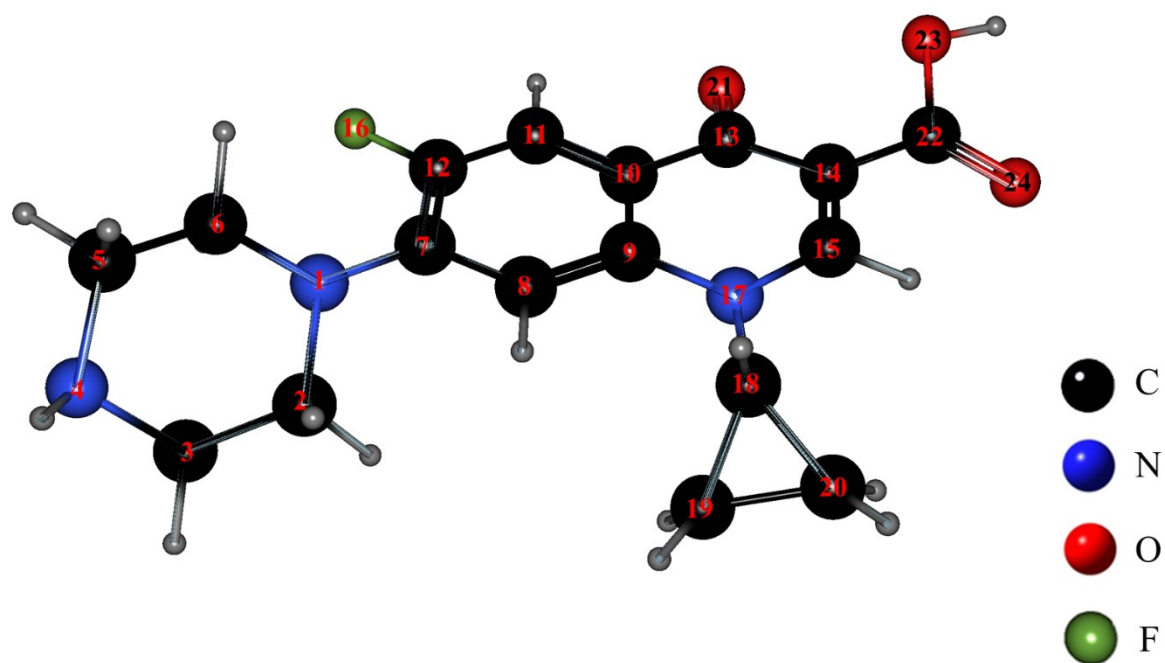

Figure S9. Atomic numbering of CIP used for FEDs analysis and discussion of reaction sites <sup>3</sup>.

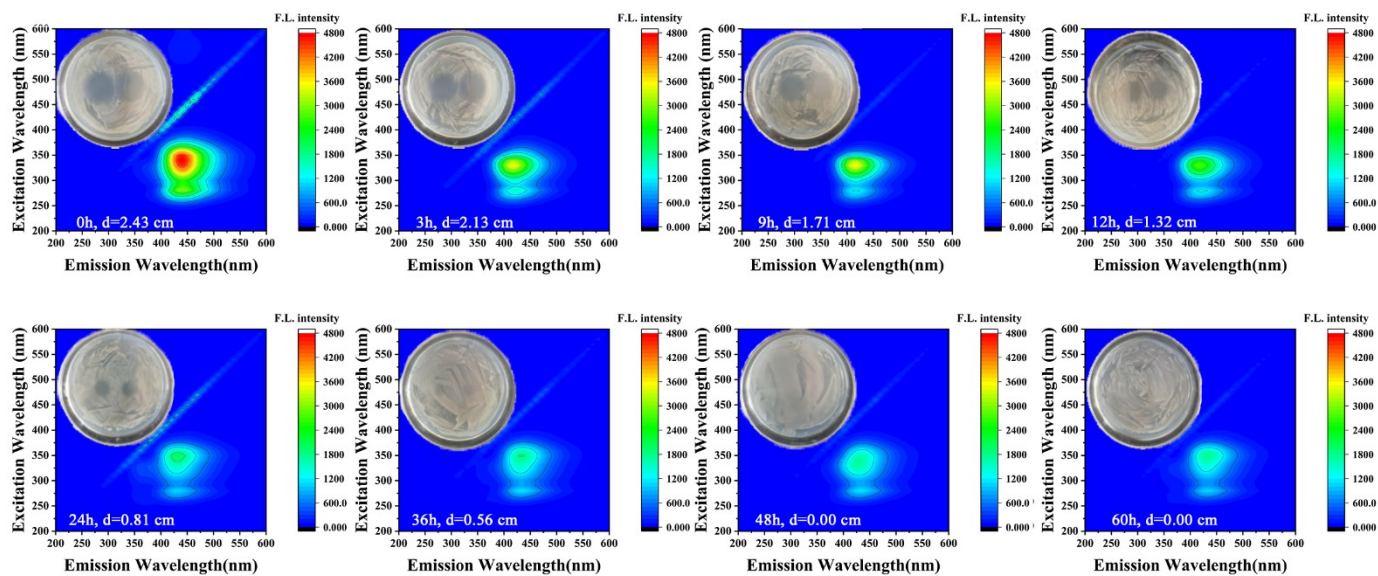

Figure S10. 3D-EEM images and antibiotic residue of CIP (*E. coli* was used as an indicator) of CIP treated solution that photocatalytic degraded. The decreasing drug sensitive ring on agar plate in the figure represents the disappearance of antibiotic residues over time. The time of the reaction and the diameter of the drug sensitive ring on agar plate were marked in white words in each image. Four pieces of CNBN membranes, ultrapure water, [CIP]=10 mg L<sup>-1</sup>, [optical power density]=5.71 mW cm<sup>-2</sup>, pH=5.3.

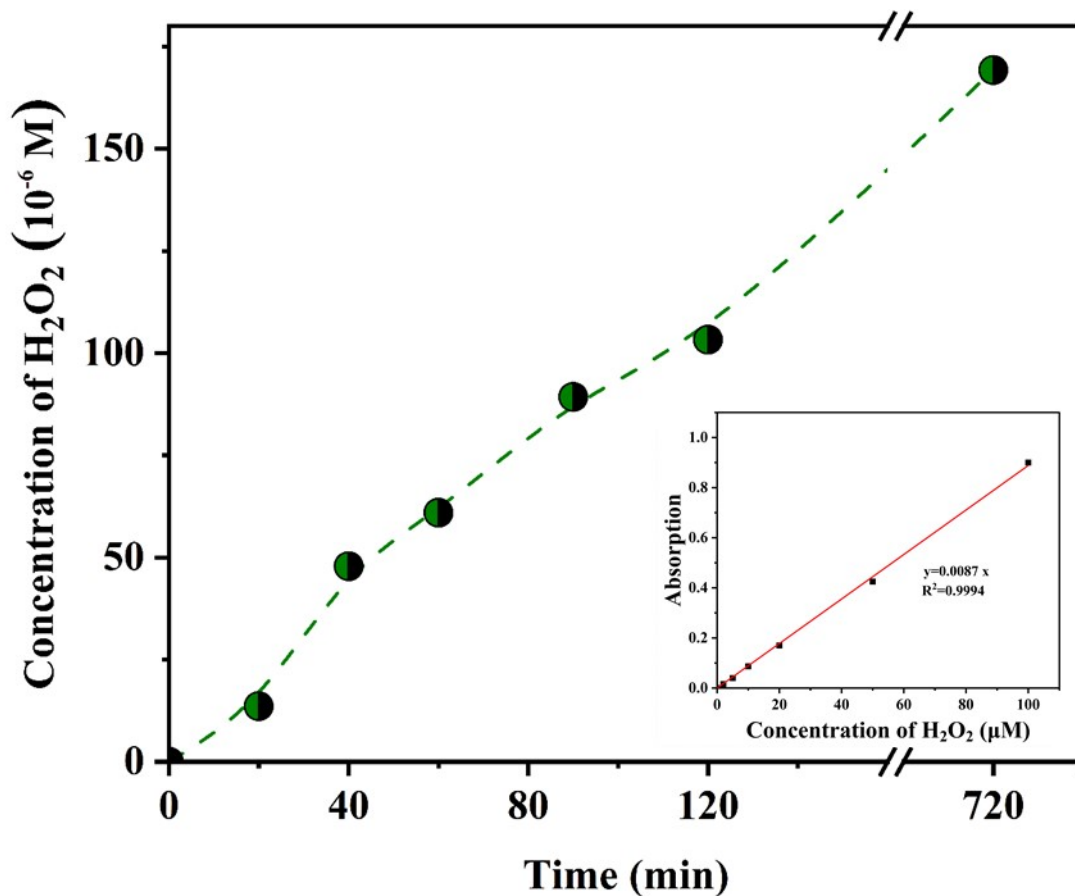

Figure S11. CNBN membrane for the photocatalytic  $\text{H}_2\text{O}_2$  production (embedded figure is the UV absorption standard curve of  $\text{H}_2\text{O}_2$ ). Four pieces of CNBN membranes, ultrapure water,  $[\text{CIP}]=10 \text{ mg L}^{-1}$ ,  $[\text{optical power density}]=5.71 \text{ mW cm}^{-2}$ ,  $\text{pH}=5.3$ .

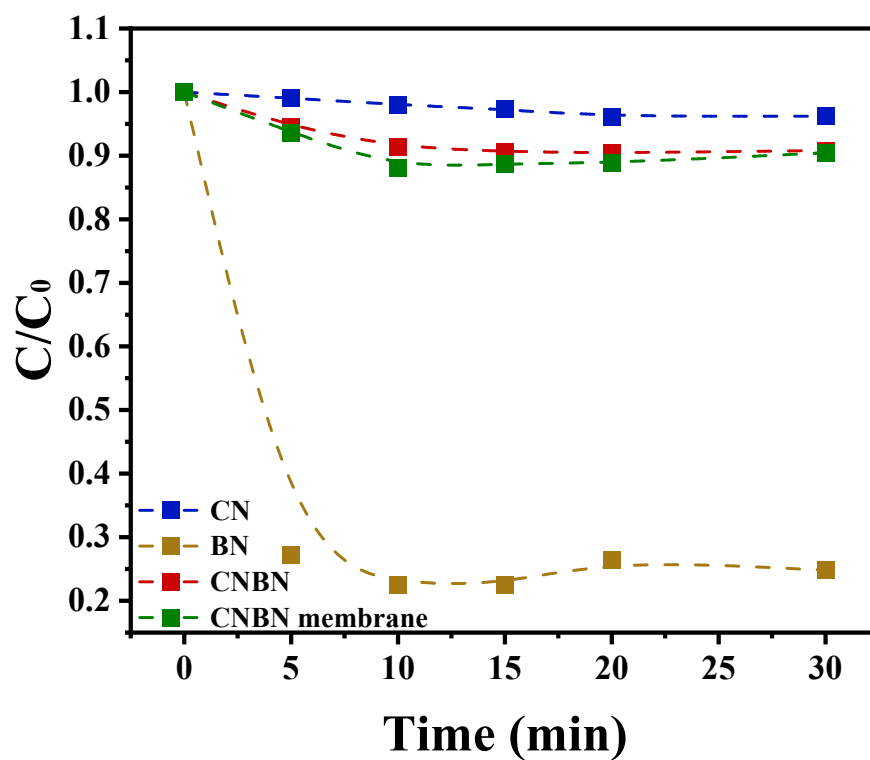

Figure S12. The adsorption equilibrium time of CIP with powder CN, powder BN, powder CNBN and CNBN membrane in dark, powder catalysts concentration= 900 mg L<sup>-1</sup>, four pieces of CNBN membranes, freshwater aquaculture wastewater, [CIP]=10 mg L<sup>-1</sup>, pH=5.3.

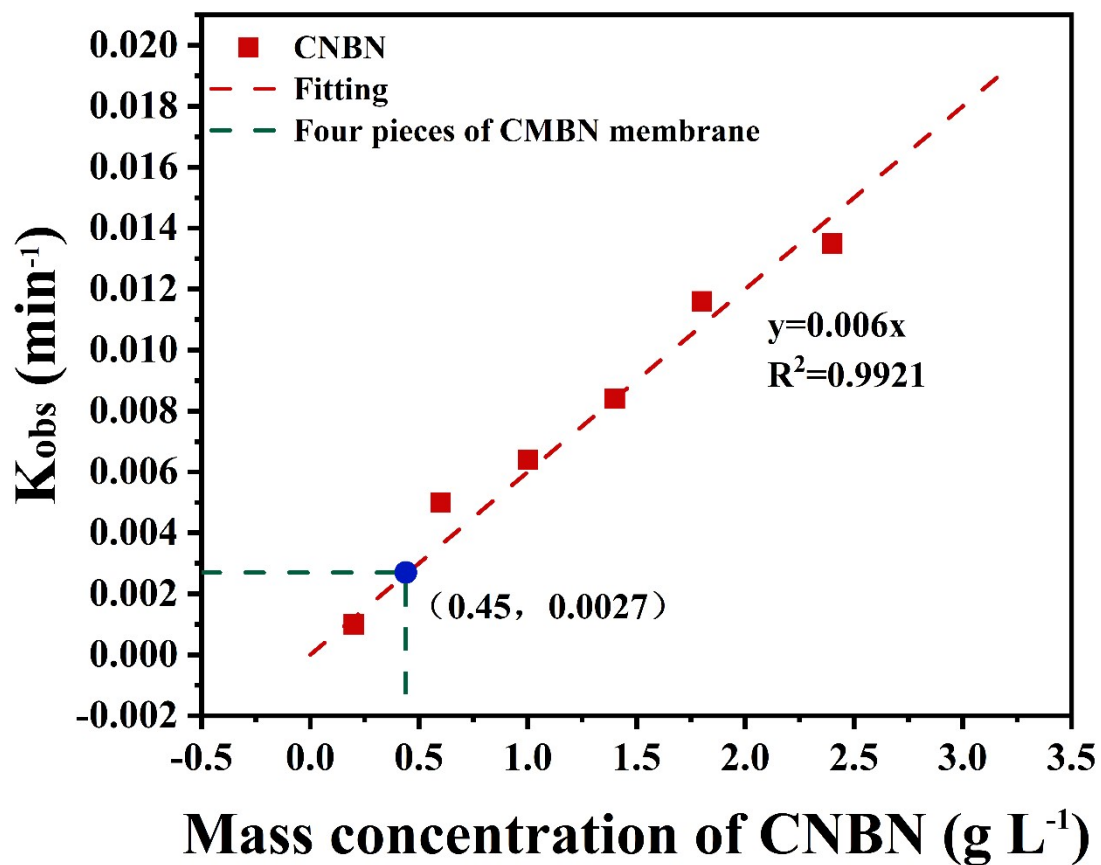

Figure S13. Photocatalytic degradation rate of CIP at different powder CNBN concentrations in freshwater aquaculture wastewater, four pieces of CNBN membranes, freshwater aquaculture wastewater,  $[\text{CIP}]=10 \text{ mg L}^{-1}$ ,  $[\text{optical power density}]= 5.71 \text{ mW cm}^{-2}$ ,  $\text{pH}=5.3$ .

## References

1. C. Kormann, D. W. Bahnemann and M. R. Hoffmann, Photocatalytic production of hydrogen peroxides and organic peroxides in aqueous suspensions of titanium dioxide, zinc oxide, and desert sand, *Environmental Science & Technology*, 1988, **22**, 798-806.
2. D. Li, C. Wen, J. Huang, J. Zhong, P. Chen, H. Liu, Z. Wang, Y. Liu, W. Lv and G. Liu, High-efficiency Ultrathin Porous Phosphorus-Doped Graphitic Carbon Nitride Nanosheet Photocatalyst for Energy Production and Environmental Remediation, *Applied Catalysis B: Environmental*, 2022, DOI: <https://doi.org/10.1016/j.apcatb.2022.121099>, 121099.
3. F. Wang, Y. Feng, P. Chen, Y. Wang, Y. Su, Q. Zhang, Y. Zeng, Z. Xie, H. Liu, Y. Liu, W. Lv and G. Liu, Photocatalytic degradation of fluoroquinolone antibiotics using ordered mesoporous g-C<sub>3</sub>N<sub>4</sub> under simulated sunlight irradiation: Kinetics, mechanism, and antibacterial activity elimination, *Applied Catalysis B: Environmental*, 2018, **227**, 114-122.
